# Supplementary material
Source: PubMed Central journal article supplement (PMC1626621)

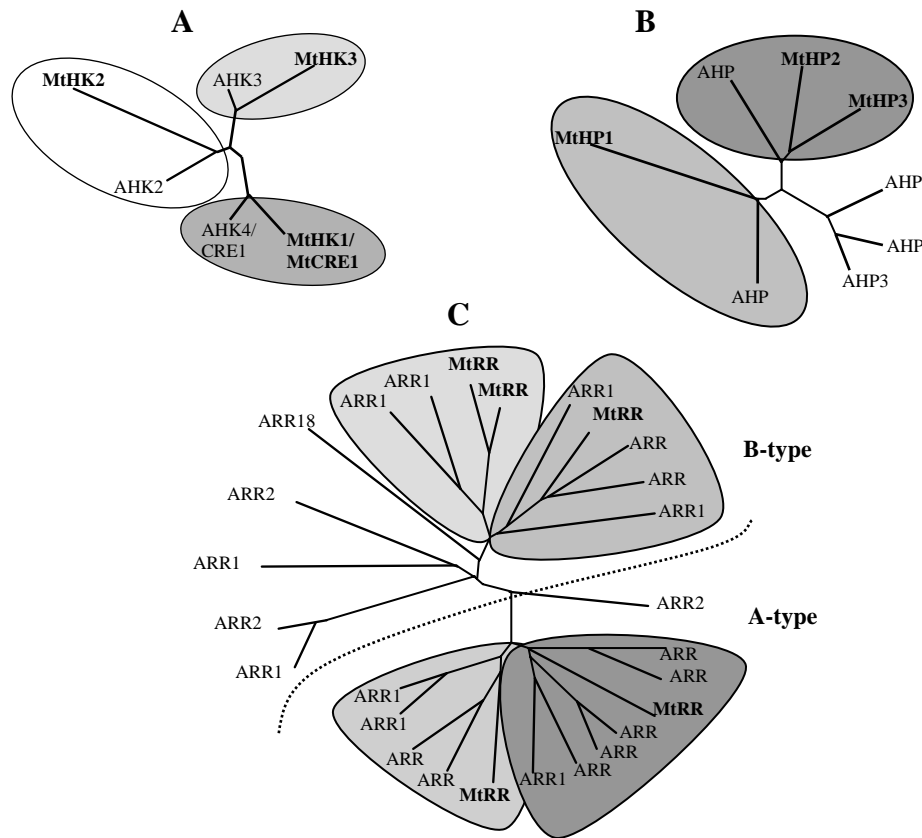

**Supplemental Figure 1. Unrooted relationship trees of *A. thaliana* and *M. truncatula* cytokinin signaling genes**

Trees represent the similarity between protein sequences of *A. thaliana* and *M. truncatula* corresponding to 3 families of genes associated to cytokinin signaling.

**A.** Putative cytokinin receptor (histidine kinase proteins) from *Arabidopsis* (AHKs) and *M. truncatula* (**Mt HKs**).

**B.** Histidine containing phosphotransfer proteins from *Arabidopsis* (AHPs) and *M. truncatula* (**Mt HPs**).

**C.** Response regulators from *Arabidopsis* (ARRs) and *M. truncatula* (**Mt RRs**). This family is divided into 2 subfamilies defined in *Arabidopsis* (Hwang et al., 2002): A-type and B-type response regulators.

Conserved domains of proteins were aligned using ClustalW software

(<http://www.ebi.ac.uk/clustalw/>) and relationship trees were built using TreeView software

(<http://taxonomy.zoology.gla.ac.uk/rod/treeview.html>). Shaded area show main branches of

the different trees, combining closest *Arabidopsis* and *M. truncatula* proteins.

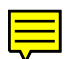

Supplement: plntcell_tpc.106.043778_1.pdf [file plntcell_tpc.106.043778_1.pdf]
