# Supplementary material
Source: PubMed Central journal article supplement (PMC1626621)
Supplement: plntcell_tpc.106.043778_4.pdf [file plntcell_tpc.106.043778_4.pdf]

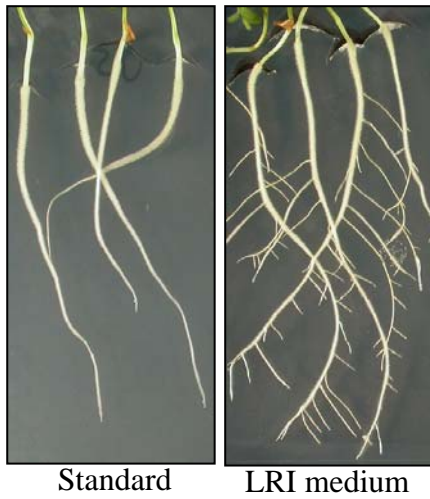

**Supplemental Figure 4. Induction of lateral roots in *M. truncatula* seedlings**

*M. truncatula* seedling roots were grown 6 days on standard medium (**left panel**) or LRIM (lateral root inducing medium; **right panel**).
