# Supplementary material
Source: PubMed Central journal article supplement (PMC1626621)
Supplement: plntcell_tpc.106.043778_6.pdf [file plntcell_tpc.106.043778_6.pdf]

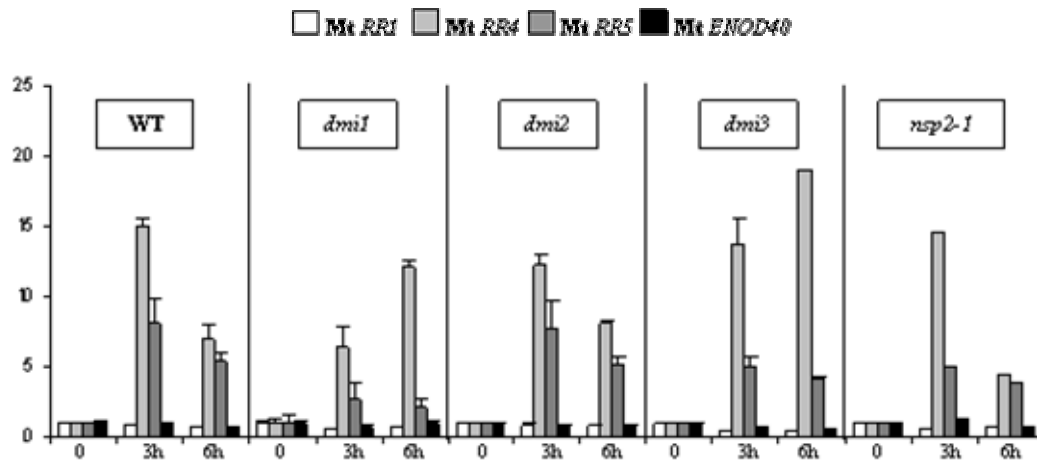

**Supplemental Figure 6. Expression analysis of nodulation and cytokinin early response genes in response to short-term cytokinin treatment.**

Real-time RT-PCR analysis of Mt *RR1*, Mt *RR4*, Mt *RR5* and Mt *ENOD40* expression in wild-type and *nod-* mutant (*dmi1-Y6*, *dmi2-TR25*, *dmi3-TRV25*, and *nsp2-1*) roots treated 3h or 6h with  $10^{-7}$ M BAP. Histogram represents the quantification of specific PCR amplification products for each gene normalized with the constitutive control Mt *ACTIN11*. The value of non-treated roots (t=0) is set to 1 as reference. A representative example out of 3 biological experiments is shown, and error bars represent standard deviation for 3 technical replicates.
