# Supplementary material
Source: PubMed Central journal article supplement (PMC1626621)
Supplement: plntcell_tpc.106.043778_7.pdf [file plntcell_tpc.106.043778_7.pdf]

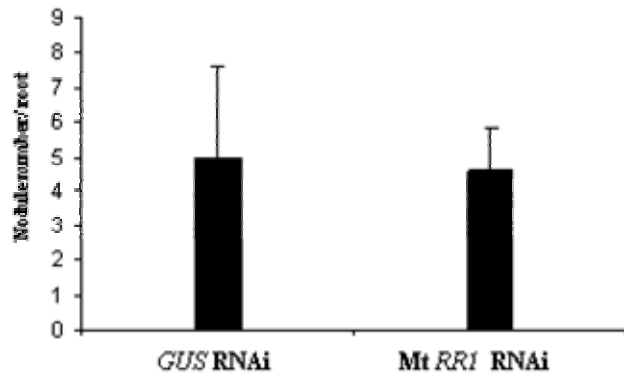

**Supplemental Figure 7. Nodule number in Mt *RRI* RNAi and control roots**

Quantification of nodules on *GUS* RNAi or Mt *RRI* RNAi roots 15 days post inoculation with *S. meliloti* 2011 strain. Histogram represents nodule number per transgenic roots (n>25). Error bars represent standard deviation.
