# Supplementary material
Source: PubMed Central journal article supplement (PMC1626621)
Supplement: plntcell_tpc.106.043778_8.pdf [file plntcell_tpc.106.043778_8.pdf]

**Supplemental Table 1.** Accession numbers are provided for TIGR TCs (release 8.0; January 2005) or NCBI genomic sequences corresponding to Mt *HKs*, Mt *HPs* and Mt *RRs*, as well as number of EST associated to each TC.

| Name           | TIGR TC Accession Number | Number of ESTs | NCBI Accession Number |
|----------------|--------------------------|----------------|-----------------------|
| Mt <i>CRE1</i> | TC109250                 | 14             | AC141922              |
| Mt <i>HK2</i>  | TC102188                 | 10             |                       |
| Mt <i>HK3</i>  | TC105228                 | 2              |                       |
| Mt <i>HK4</i>  | TC109775                 | 5              |                       |
| Mt <i>HK5</i>  | TC104437                 | 3              |                       |
| Mt <i>HP1</i>  | TC106865                 | 60             | AC146553              |
| Mt <i>HP2</i>  | TC110295                 | 4              |                       |
| Mt <i>HP3</i>  | TC108942                 | 7              | AC155882              |
| Mt <i>RR1</i>  | TC95950                  | 10             |                       |
| Mt <i>RR2</i>  | TC94164                  | 6              |                       |
| Mt <i>RR3</i>  | TC96138                  | 9              |                       |
| Mt <i>RR4</i>  | TC103991                 | 5              |                       |
| Mt <i>RR5</i>  | TC95394                  | 16             |                       |
