# Supplementary material
Source: PubMed Central journal article supplement (PMC1626621)
Supplement: plntcell_tpc.106.043778_9.pdf [file plntcell_tpc.106.043778_9.pdf]

**Supplemental Table 2.** Primers used in real-time and semi-quantitative RT-PCR assays are indicated, as well as PCR efficiencies for primer combinations used in real-time RT-PCR experiments. n.d., not determined.

| <b>Target sequence</b>           | <b>Forward primer</b>  | <b>Reverse primer</b>    | <b>PCR efficiency (%)</b> |
|----------------------------------|------------------------|--------------------------|---------------------------|
| Mt <i>CRE1</i>                   | CACCACCCTTTGGCTTCTAA   | CACTAAGTAGCGGCCTTTCG     | 98.5                      |
| Mt <i>HK2</i>                    | AGTCAACCACGGTTTTCTC    | TCCTCCAACAAGAAGATGG      | 94                        |
| Mt <i>HK3</i>                    | GGGTACATCAATTGGCATCC   | TCGTGCGAAACAGTAGCAAG     | 93                        |
| Mt <i>HP1</i>                    | TGGATGGTCAGTTTCTCAA    | CTTCAACAGAGAAGAGGGATCAA  | 94.5                      |
| Mt <i>HP2</i>                    | GCATCTCTACAGATCCACTC   | ATAGATGCGTGCCGCAGGTG     | 93                        |
| Mt <i>HP3</i>                    | GTGGATGCTCTTGTTACCA    | TGGATGGATCACTGCGTAAA     | 92                        |
| Mt <i>RR1</i>                    | GCTGAAGTTCACATGCCTGA   | CAGCTCCACAGACCAAACAA     | 99                        |
| Mt <i>RR2</i>                    | GGTGTAAACACACGGTGCTTG  | ATCAGATGCCTTCGGATGTC     | 96                        |
| Mt <i>RR3</i>                    | TGGTGCCTGTGATTATCTGC   | CCTCGTCTTCGTCTTCATCC     | 98                        |
| Mt <i>RR4</i>                    | ATGCTTTTGTTCGGGTTTA    | CTGCACCTTCCTCCAAACAT     | 100                       |
| Mt <i>RR5</i>                    | TGGCTGCAGAGTCACAGTTT   | TCACCTCCACTTCCTGATGA     | 93                        |
| Mt <i>ACTIN11</i>                | ACGAGCGTTTTAGATG       | ACCTCCGATCCAGACA         | 100                       |
| Mt <i>EF1<math>\alpha</math></i> | ATTCCAAAGGCGGCTGCATA   | CTTTGCTTGGTGCTGTTTAGATGG | 96                        |
| Mt <i>ENOD40</i>                 | CCCTACACACTCTCCCTCCA   | CACAAAAAGGCAATGGATTCCT   | 98.5                      |
| Mt <i>NIN</i>                    | GGAAGATTGAGAGGGGAAGCTT | GCAATGTGGGGATTTAGAGATT   | 99                        |
| Mt <i>NSP2</i>                   | GACACACTTGCTGCTTTCCA   | AATGCGGTATCCGAAGATG      | 95                        |
| Mt <i>ENOD11</i>                 | ATCCACAATATGCCTCAA     | AGGAAGTGGTGGCTTTAGCA     | n.d.                      |
| Mt <i>ENOD12</i>                 | TCCTCAAGGCTTTGCTGAAT   | CTATGCGTCGGTGATTCCTT     | n.d.                      |
